# Supplementary material for: Electron Flow From the Inner Membrane Towards the Cell Exterior in Geobacter sulfurreducens: Biochemical Characterization of Cytochrome CbcL
Source: Frontiers journal article supplement (doi:10.3389/fmicb.2022.898015), 2022-05-10
Supplement: Presentation_1.zip [file Presentation_1.zip]

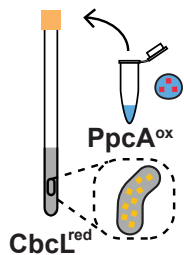

**CbcL<sup>red</sup>**

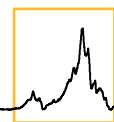

**PpcA<sup>red</sup>**

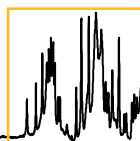

**CbcL:PpcA  
1:0**

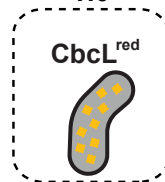

**1:1**

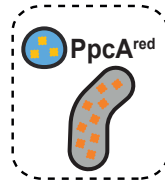

**1:2**

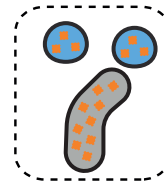

**1:3**

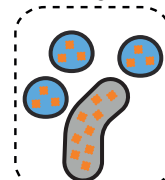

**1:4**

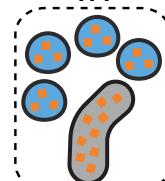

**1:4 + O<sub>2</sub>**

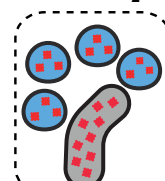

**PpcA<sup>ox</sup>**

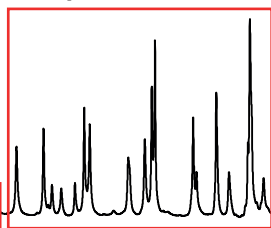

**CbcL<sup>ox</sup>**

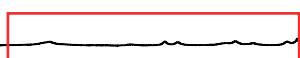

35 30 25 20 15 10 5 0 -5 -10 -15

$\delta$  <sup>1</sup>H (ppm)
