# Supplementary figures and images for: Electron Flow From the Inner Membrane Towards the Cell Exterior in Geobacter sulfurreducens: Biochemical Characterization of Cytochrome CbcL
Source: Frontiers journal article supplement (doi:10.3389/fmicb.2022.898015), 2022-05-10

**A**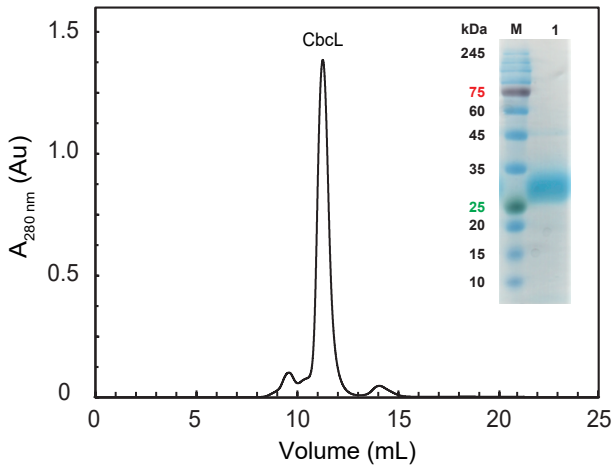**B**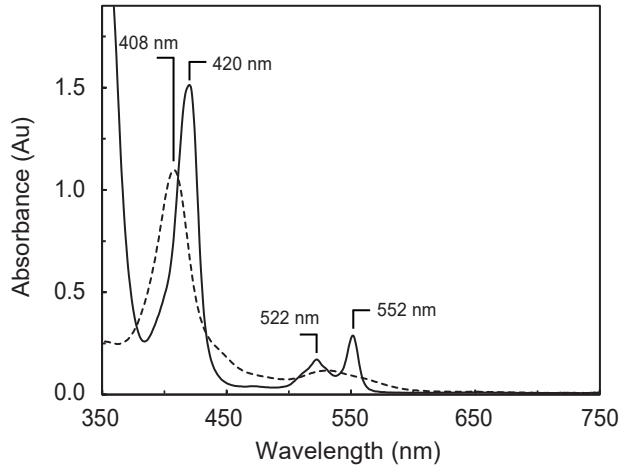

Supplement: Presentation_1.zip [file Presentation_1.zip]

**A**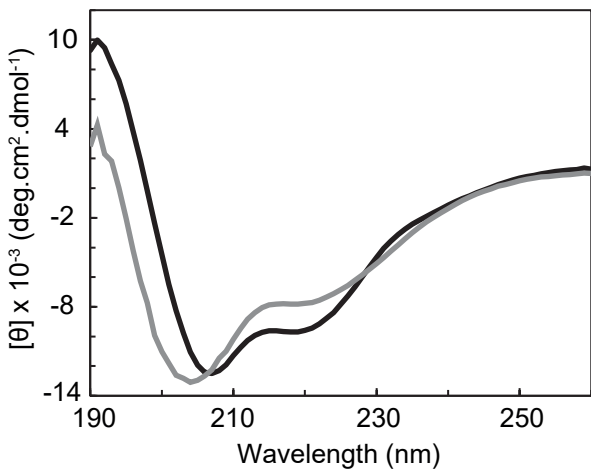**B**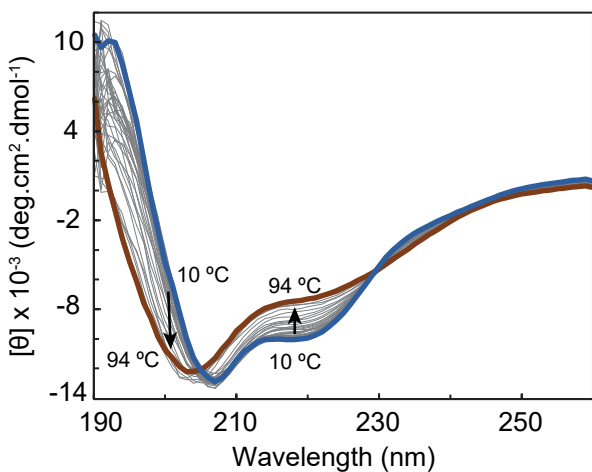**C**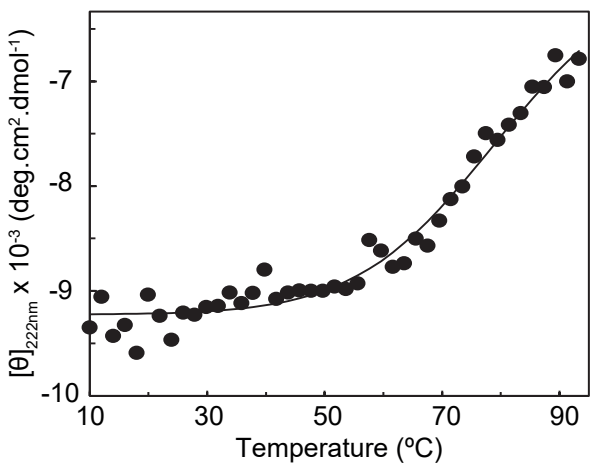

Supplement: Presentation_1.zip [file Presentation_1.zip]

A

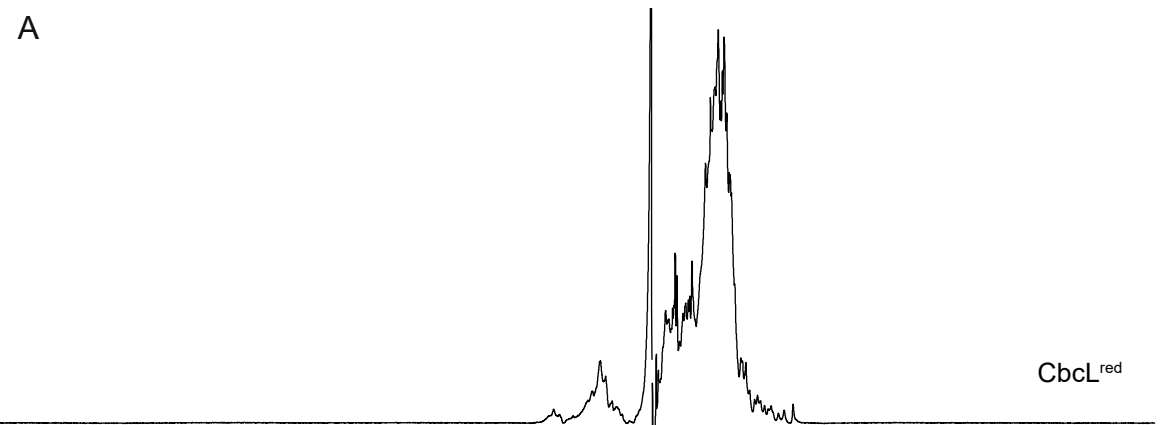CbcL<sup>red</sup>

B

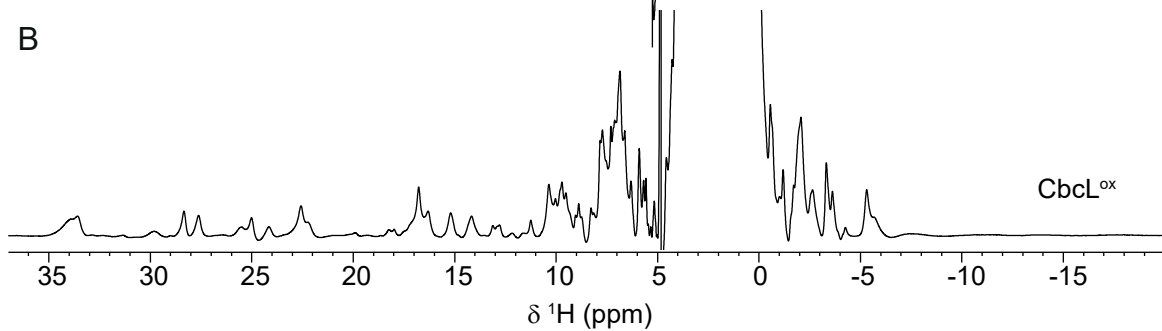CbcL<sup>ox</sup>

Supplement: Presentation_1.zip [file Presentation_1.zip]

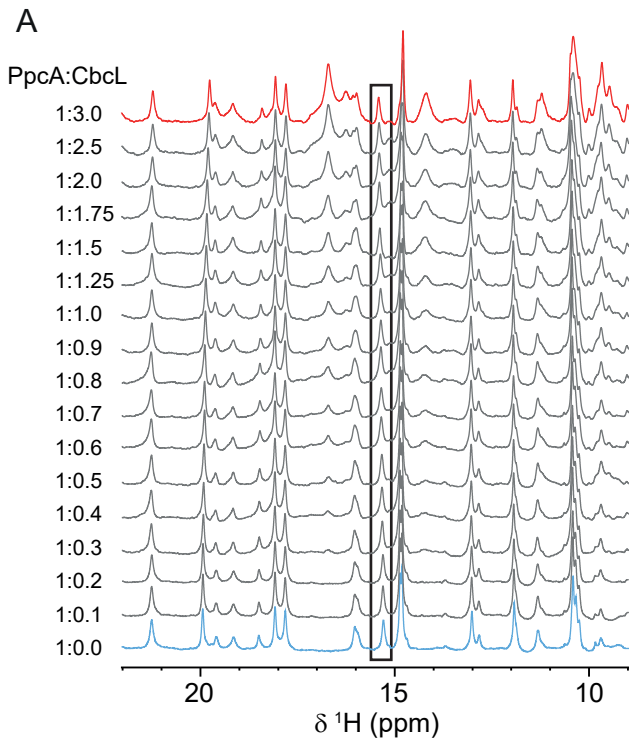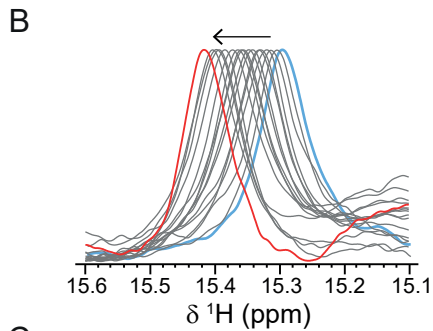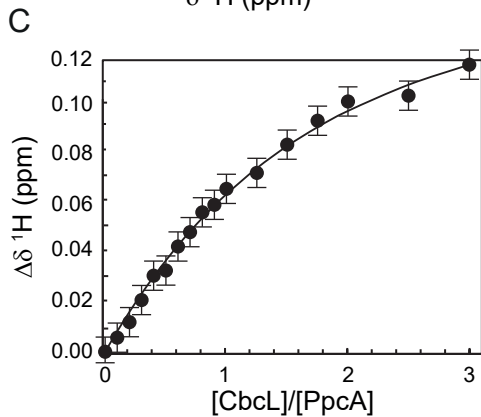

Supplement: Presentation_1.zip [file Presentation_1.zip]

A

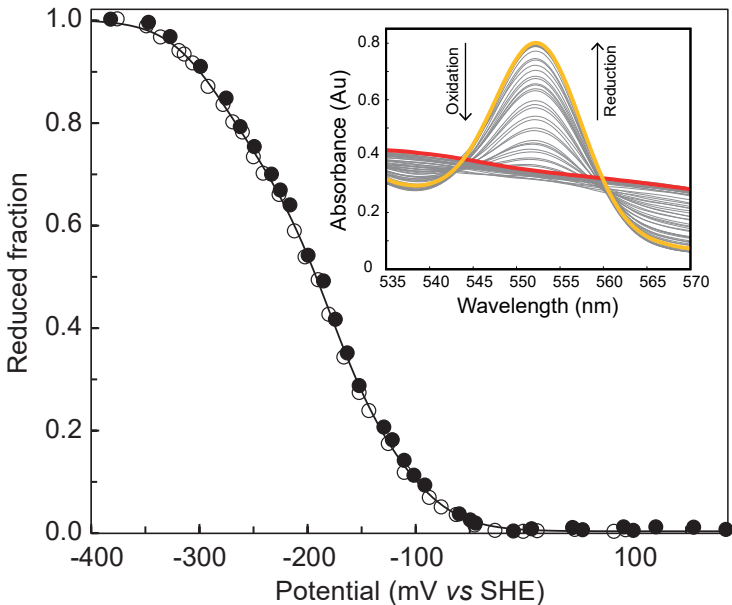

B

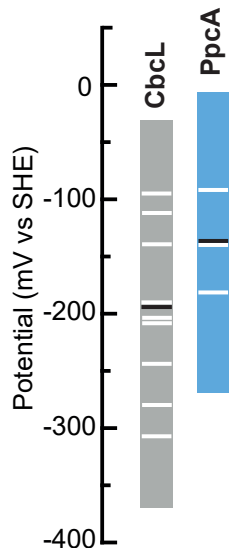

C

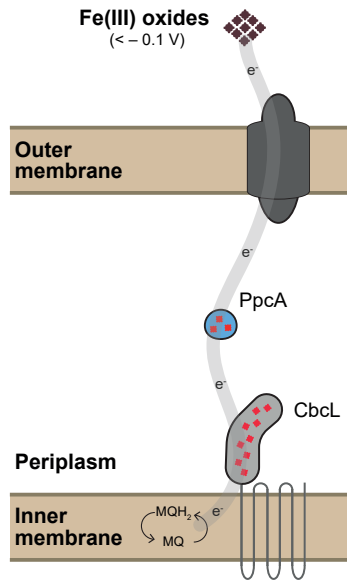

Supplement: Presentation_1.zip [file Presentation_1.zip]
